# Supplementary material for: Completion of the entire hepatitis C virus life cycle in genetically humanized mice
Source: Springer Nature journal article supplement (doi:10.1038/nature12427), 2013-07-31
Supplement: 41586_2013_BFnature12427_MOESM34_ESM.pdf [file 41586_2013_BFnature12427_MOESM34_ESM.pdf]

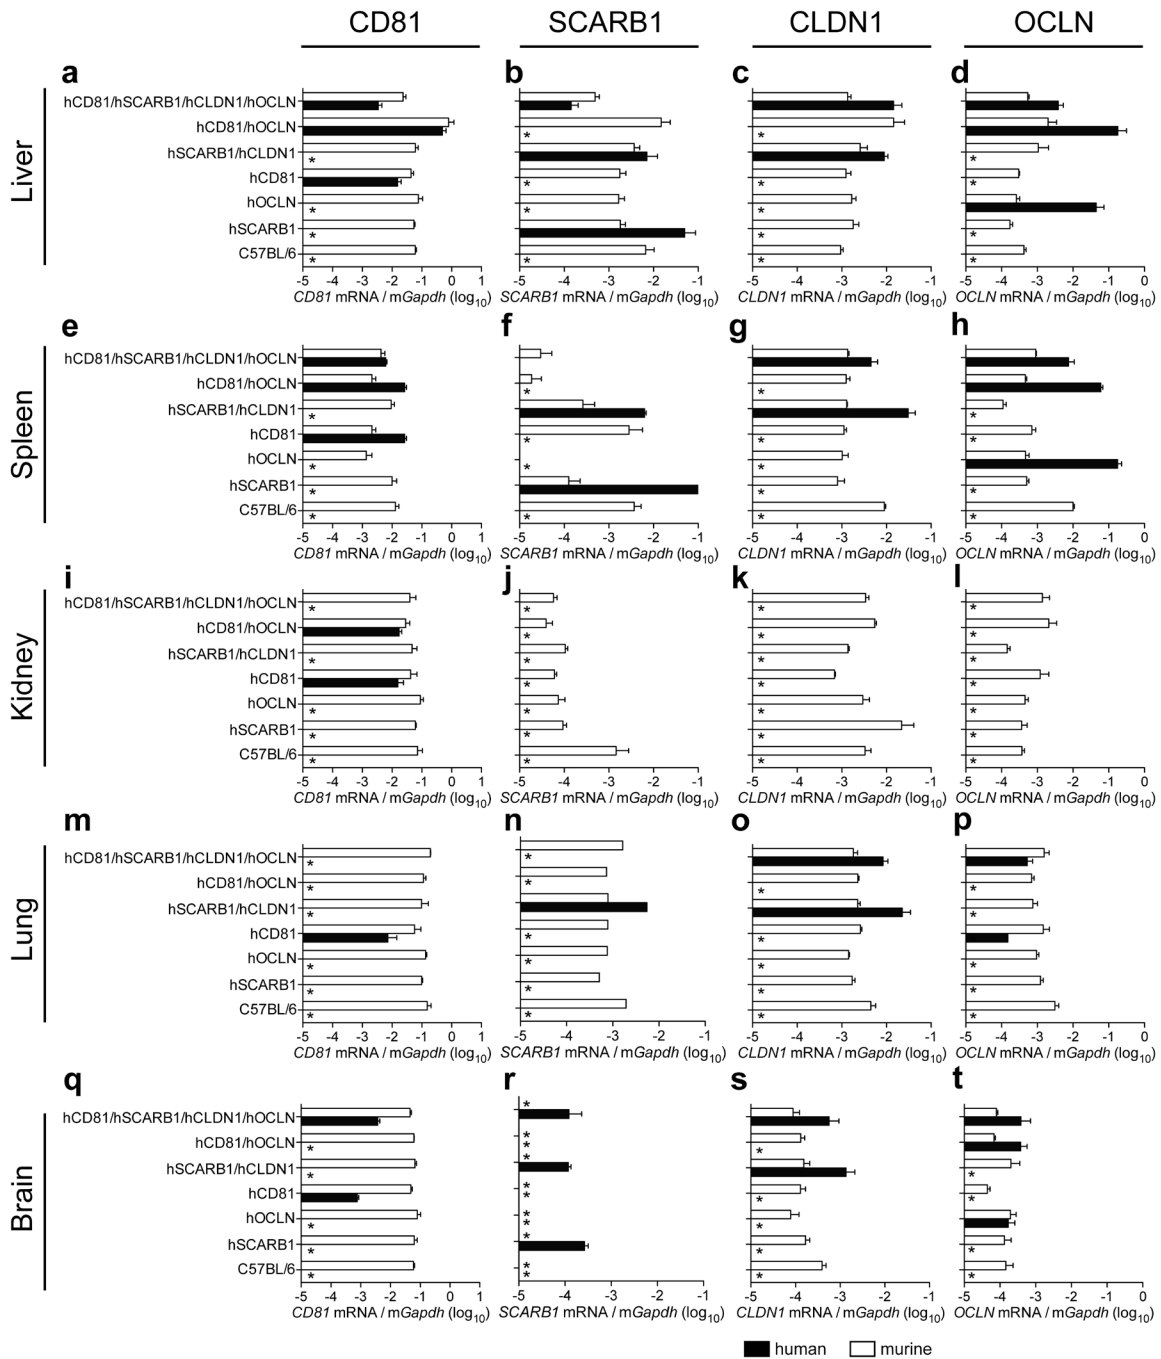

**Supplementary figure 1. Liver-specific expression of HCV entry factors in entry factor-transgenic mice.** (a-t) Expression of the human and murine HCV entry factors (a, e, i, m, q) *CD81*, (b, f, j, n, r) *SCARB1*, (c, g, k, o, s) *CLDN1*, and (d, h, l, p, t) *OCLN* mRNAs in (a, b, c, d) liver, (e, f, g, h) spleen, (i, j, k, l) kidney, (m, n, o, p) lung, and (q, r, s, t) brain of mice transgenically expressing either all HCV entry factors (hCD81/hSCARB1/hCLDN1/hOCLN1), hCD81 and hOCLN, hSCARB1 and hCLDN1, hCD81, hOCLN, hSCARB1 or in wild-type control animals (C57BL/6) as determined by quantitative real-time PCR. Data shown are mean  $\pm$  SD of four individual animals.

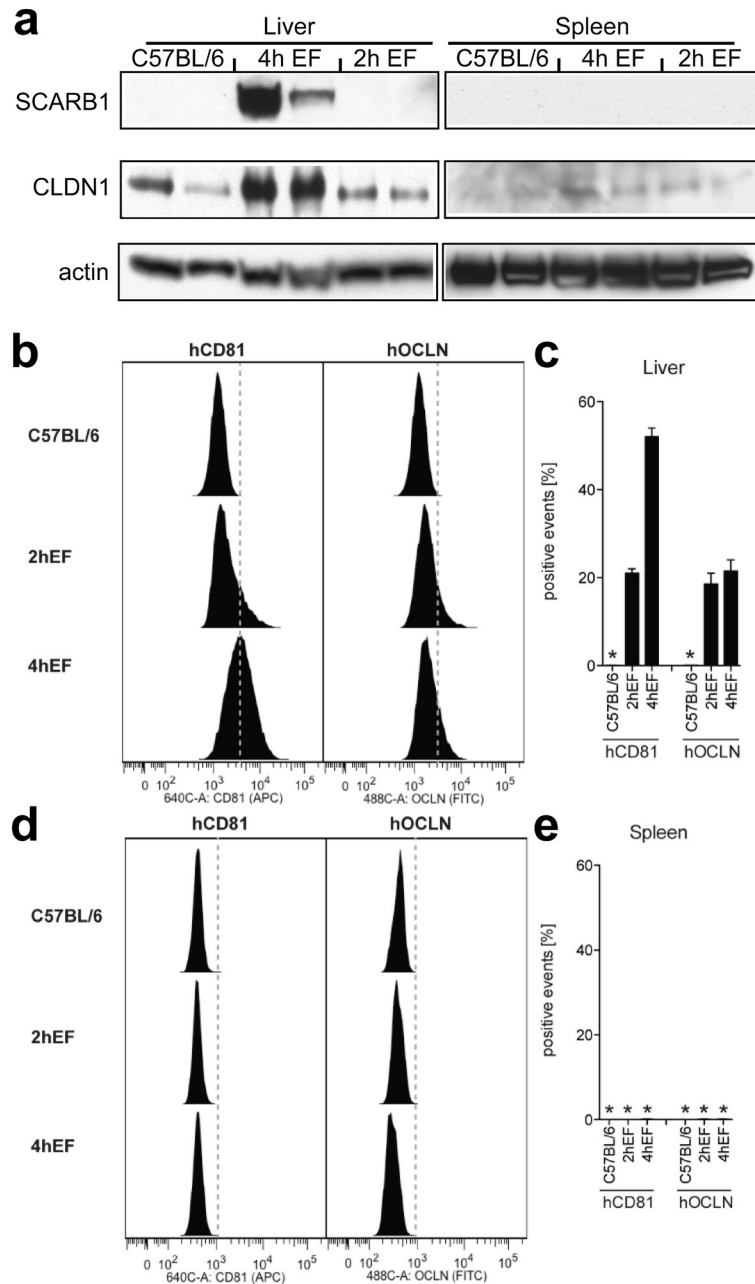

**Supplementary figure 2. Protein expression of human HCV entry factors. (a).** Protein expression of human SCARB1 and OCLN in the liver and spleen of wild-type animals (C57BL/6), and mice transgenically expressing either all four human HCV entry factors (4h EF) or human CD81 and OCLN (2hEF) as determined by Western blot. Data shown are from two independent animals. Actin was used as a loading control. Flow-cytometric analysis of human CD81 and human OCLN protein expression in livers (**b, c**) and spleens (**d, e**) of non-transgenic control mice (C57BL/6), mice expressing human CD81 and OCLN (2hEF) or all four entry factors (hCD81/hSCARB1/hCLDN1/hOCLN1). (**b, d**) Representative histogram plots, (**c, e**) Frequency of entry factor positive cells (hCD81 or hOCLN as indicated).

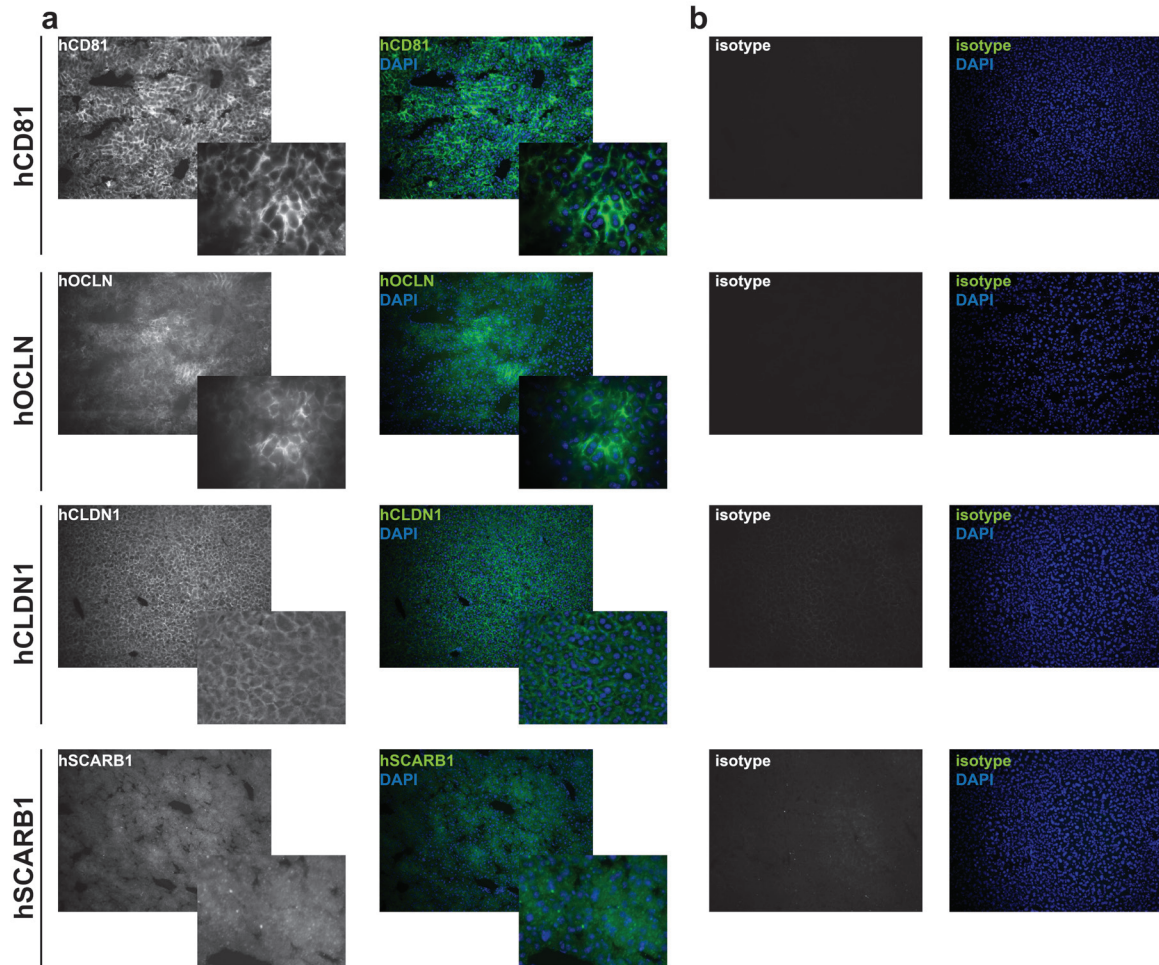

**Supplementary figure 3. Histological analysis of human HCV entry factor expression in the liver of entry factor transgenic animals.** Expression of human CD81, OCLN, CLDN1 and SCARB1 in the liver of mice transgenically expressing all four human HCV entry factors. Data shown are from one of four representative animals.

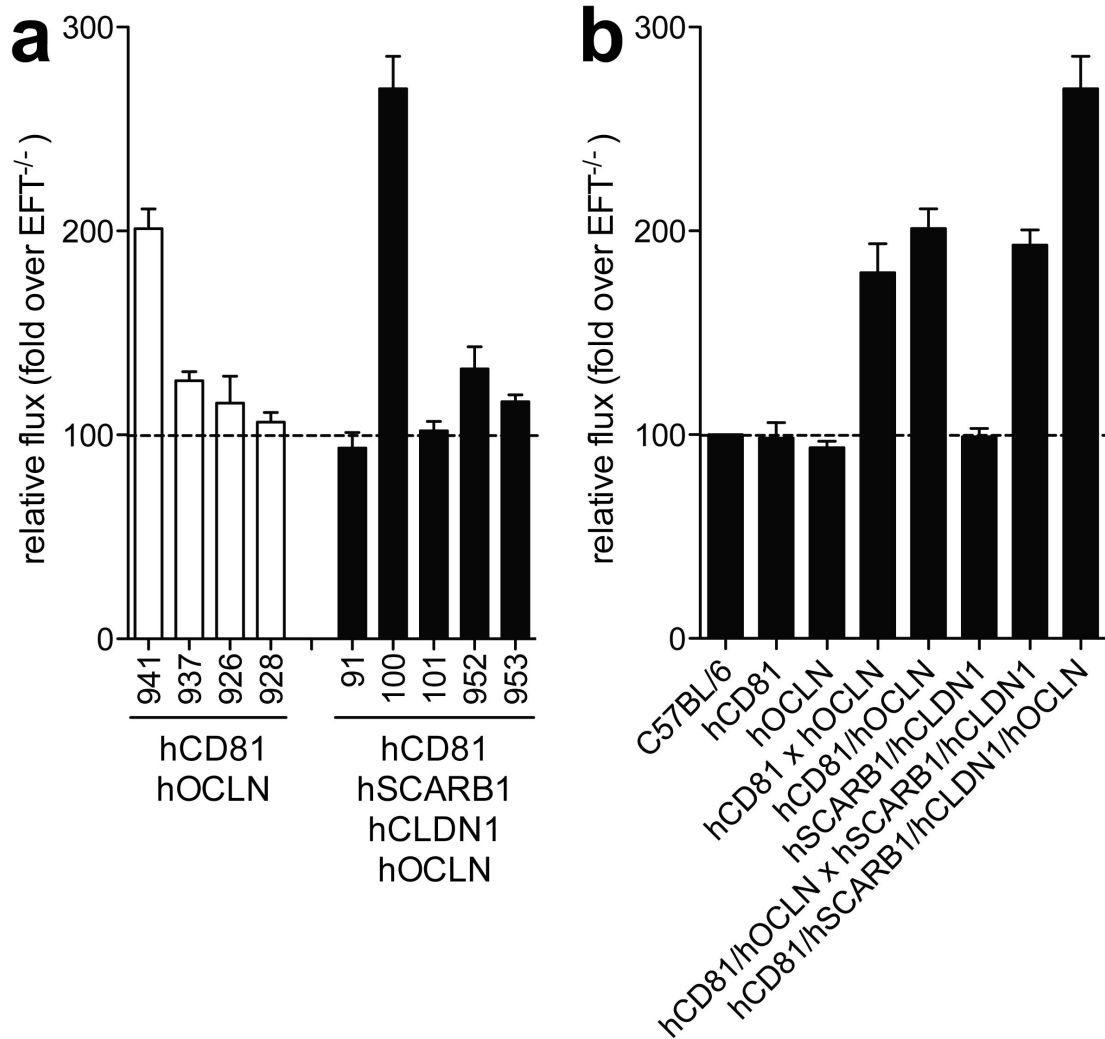

**Supplementary figure 4. Analysis of HCV entry into different founder animals transgenically expressing HCV entry factors. (a)** HCV entry efficiency in distinct founder animals on the Rosa26-LSL-Fluc background expressing either human CD81 and OCLN or all four HCV entry factors. **(b)** HCV entry in mice expressing either human CD81, human OCLN, human CD81 and human OCLN as individual transgenes (hCD81 x hOCLN), human CD81 and human OCLN as a combined transgene (hCD81/hOCLN), human SCARB1 and human CLDN1, all four HCV entry factors as individual transgenes (hCD81/hOCLN x hSCARB1/hCLDN1) or as combined transgenes (hCD81/hSCARB1/hCLDN1/hOCLN). Mice were injected with  $2 \times 10^7$  TCID<sub>50</sub> BiCre-Jc1 and analyzed by in vivo bioluminescence imaging 72h post infection. Data shown are means  $\pm$  SD from two independent experiments (n=6-8 mice per experiment).

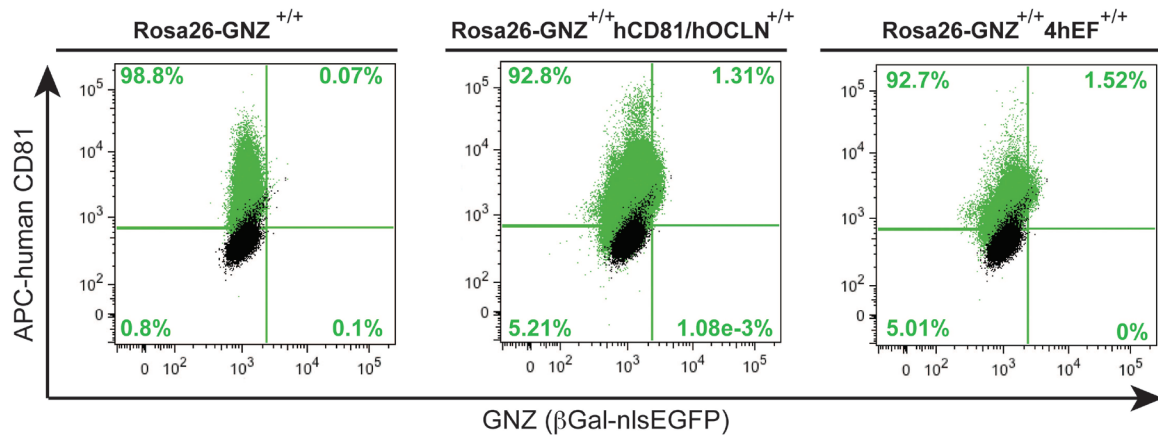

**Supplementary figure 5. Quantification of HCV-infected hepatocytes in HCV entry factor transgenic mice.** Rosa26-GNZ mice or Rosa26-GNZ mice expressing either human CD81 and human OCLN or all four human HCV entry factors were infected with  $2 \times 10^7$  TCID<sub>50</sub> BiCre-Jc1 72h prior to analysis by flow cytometry. Hepatocytes were isolated by a two-step perfusion, stained for human CD81 prior to analysis. Data shown are from one of four representative experiments.

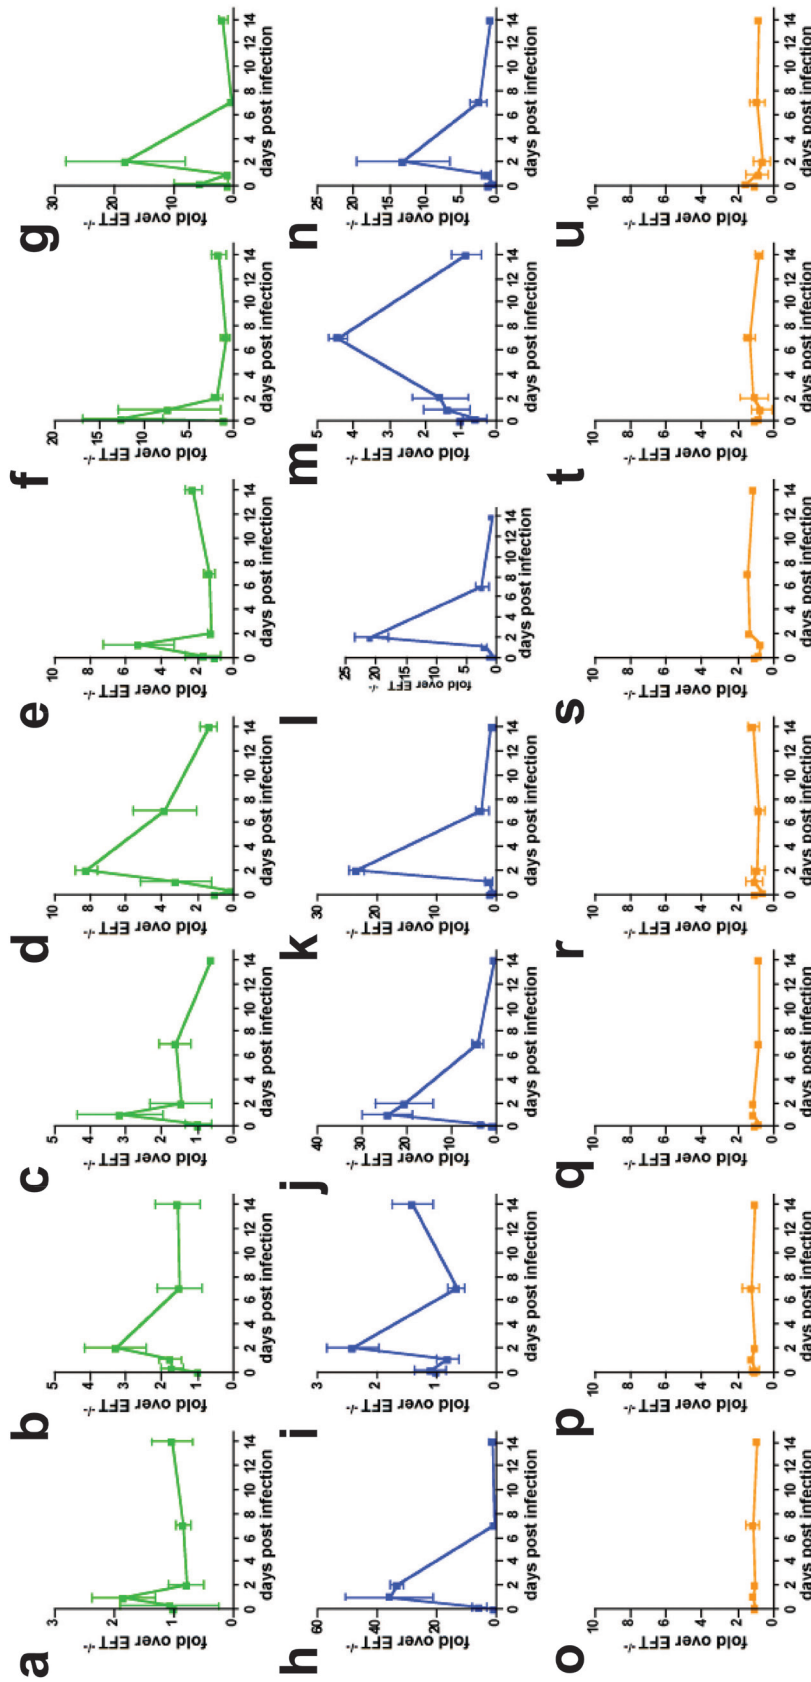

**Supplementary figure 6. HCV infection induces interferon stimulated genes in HCV entry factor transgenic mice. (a-u)** Longitudinal expression of interferon-stimulated genes (a, h, o) *mx-1*, (b, l, p) *2'OAS*, (c, j, q) *viperin*, (d, k, r) *ifit2/2a*, (e, l, s) *ifi44*, (f, m, t) *eif2ak2*, (g, n, u) *cxcl10* in the (a-g) liver, (h-n) spleen and (o-u) brain of mice infected with Con 1/Jc1. Data shown are presented as mean  $\pm$  SD of fold over entry factor negative mice (C57BL/6) from three independent experiments.

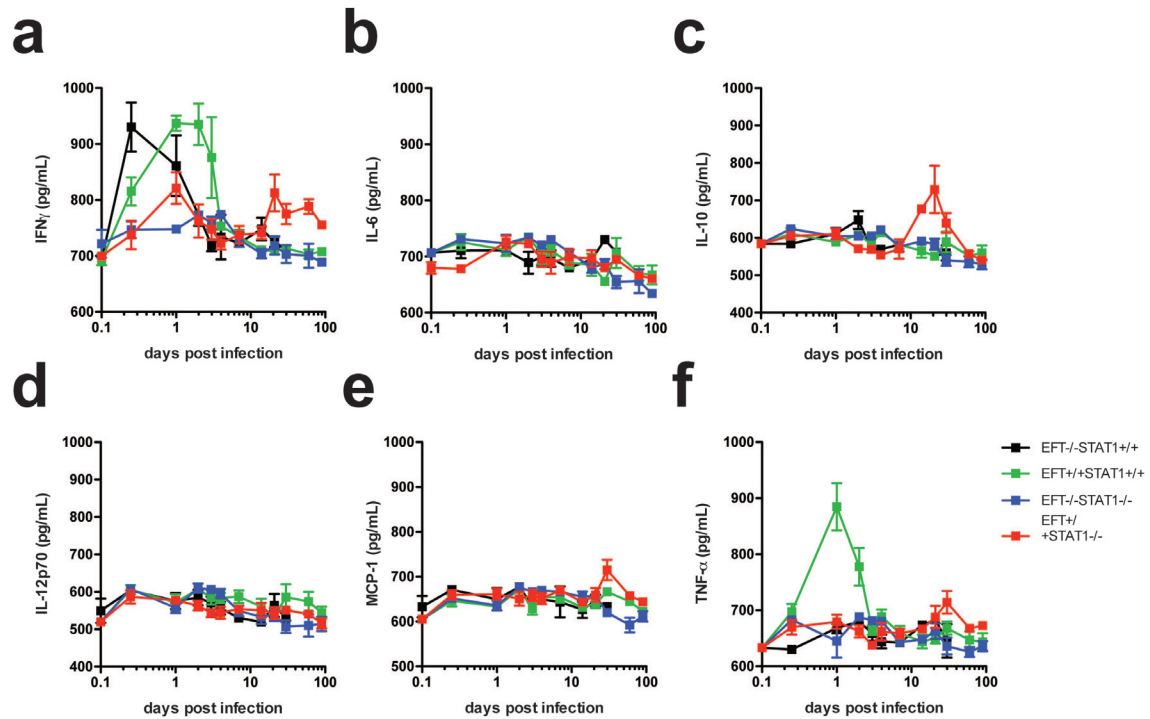

**Supplementary figure 7. HCV infection induces proinflammatory cytokines and interferons in entry factor transgenic mice.** (a-f) Kinetic of the induction of (a) IFN $\gamma$ , (b) IL-6, (c) IL-10, (d) IL-12p70, (e) MCP-1, and (f) TNF- $\alpha$  in the serum of either wild-type mice (EFT $^{-/-}$  STAT1 $^{+/+}$ ), STAT1-deficient mice (EFT $^{-/-}$  STAT1 $^{-/-}$ ), HCV entry factor transgenic mice (EFT $^{+/+}$  STAT1 $^{+/+}$ ) or HCV entry factor transgenic STAT1-deficient mice (EFT $^{+/+}$  STAT1 $^{-/-}$ ) following infection with Con1/Jc1. Data shown are mean  $\pm$  SD of three independent experiments.

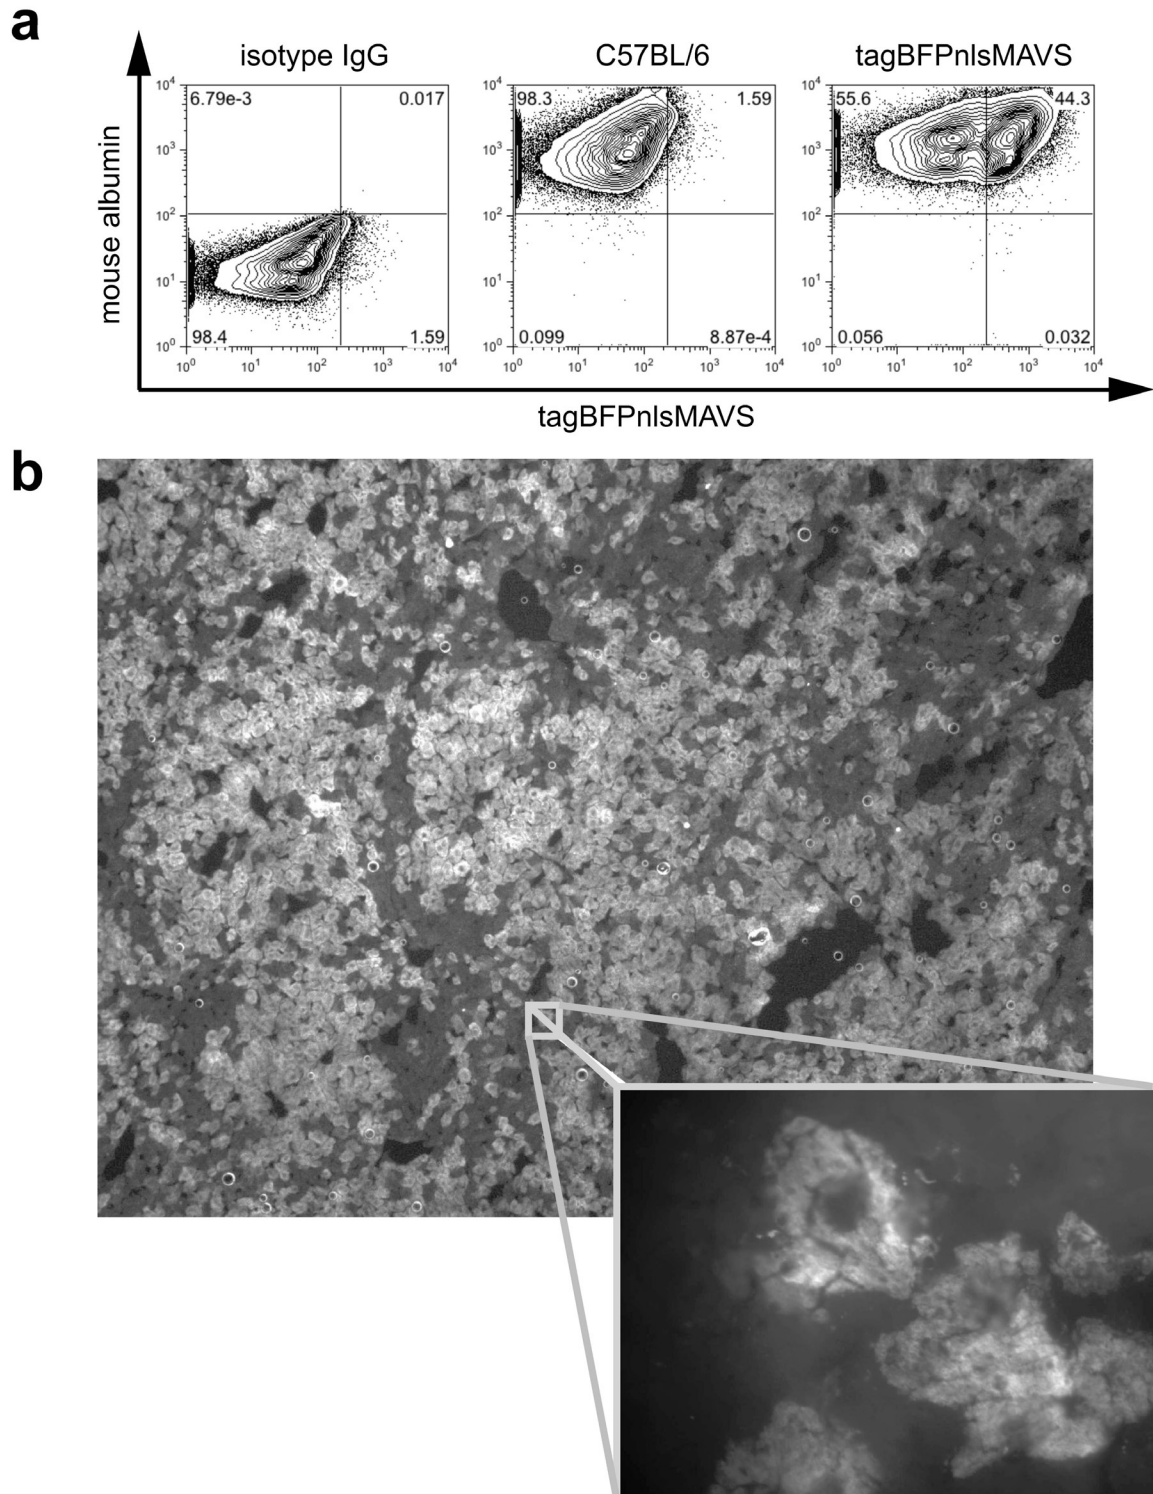

**Supplementary figure 8. Characterization of tagBFPnlsMAVS-transgenic mice. (a)** Expression levels of the tagBFPnlsMAVS transgene on albumin-positive hepatocytes isolated from either wild-type mice or tagBFPnlsMAVS-transgenic mice. **(b)** Histology of the distribution of tagBFPnlsMAVS-expressing hepatocytes in the liver of tagBFPnlsMAVS-transgenic mice. Data shown are from one of four representative experiments.



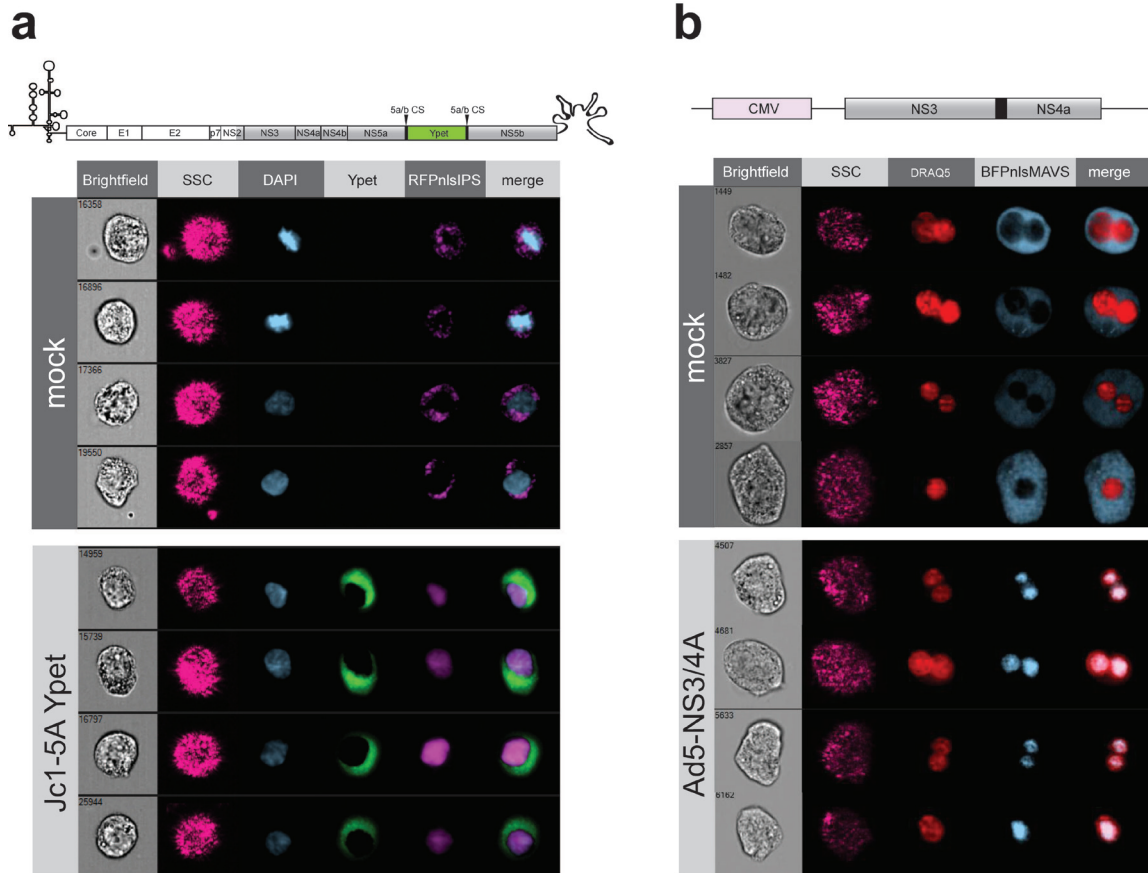

**Supplementary figure 9. Validation of Imagestream X to determine the HCV infection frequency in hepatocytes. (a)** Huh7.5 cells stably expressing the RFPnlsMAVS cell-based HCV infection reporter system were either mock electroporated or electroporated with Jc1-5AB Ypet. 72h post electroporation cell nuclei were counterstained with DAPI and images were acquired using Imagestream X. **(b)** Mice transgenically expressing tagBFPnlsMAVS were injected with  $10^{10}$  adenoviral particles expressing the HCV protease (NS3-4A). 24h post infection hepatocytes were isolated and nuclei were counterstained using DRAQ5. Data shown are one representative of three experiments.

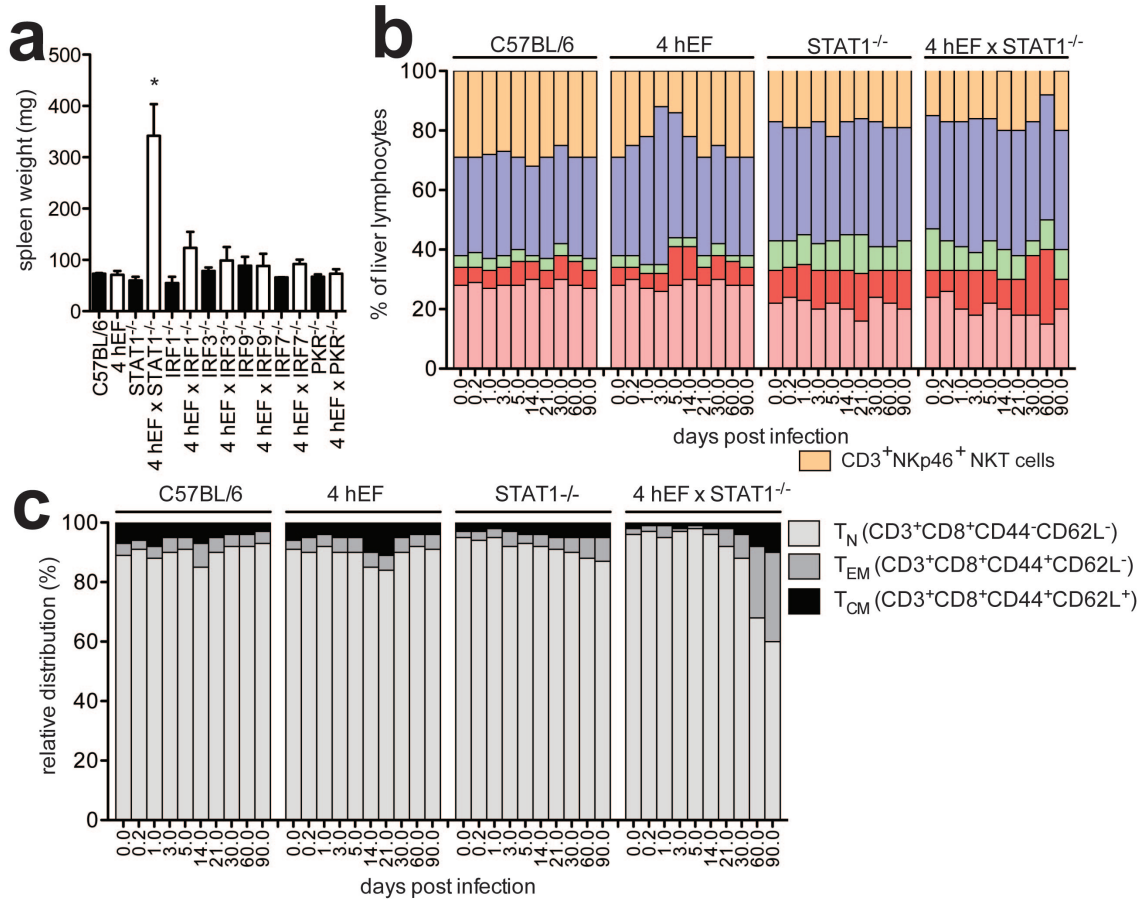

**Supplementary figure 10: HCV infection in 4hEF STAT1<sup>-/-</sup> mice leads to splenomegaly and immune activation.** (a) weights of spleens of mice with the indicated genotype 90 days post infection with BiCre-Jc1. (b) Relative frequencies of the indicated lymphocyte subsets (b) CD8<sup>+</sup> T cell memory and effector cells (c) in livers of wild-type, 4hEF, STAT1<sup>-/-</sup>, STAT1<sup>-/-</sup> 4hEF mice isolated at the indicated time-points post infection with Con1/Jc1.

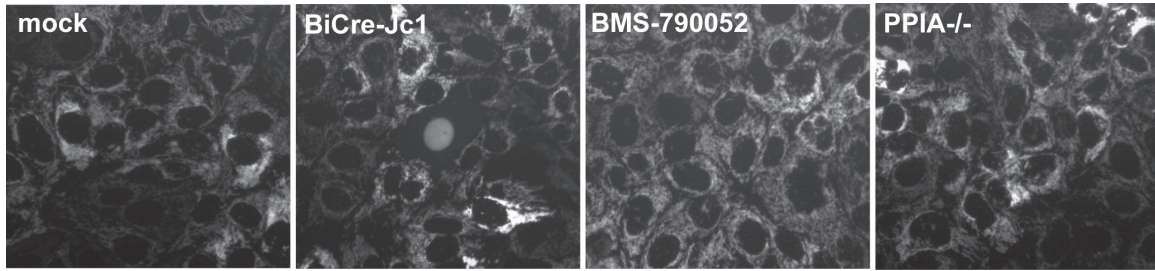

**Supplementary figure 11: Virus assembly and release in mice expressing all four human HCV entry factors as evidenced by nuclear translocation of the tagRFPnlsMAVS reporter.** HCV infectious particles released into the serum of 4hEF STAT<sup>-/-</sup> mice, 4hEF STAT<sup>-/-</sup> PPIA<sup>-/-</sup> or 4hEF STAT1<sup>-/-</sup> mice treated with BMS-790052 for 20 days visualized by nuclear translocation in Huh-7.5 TagRFPnlsMAVS reporter cells.

**a**

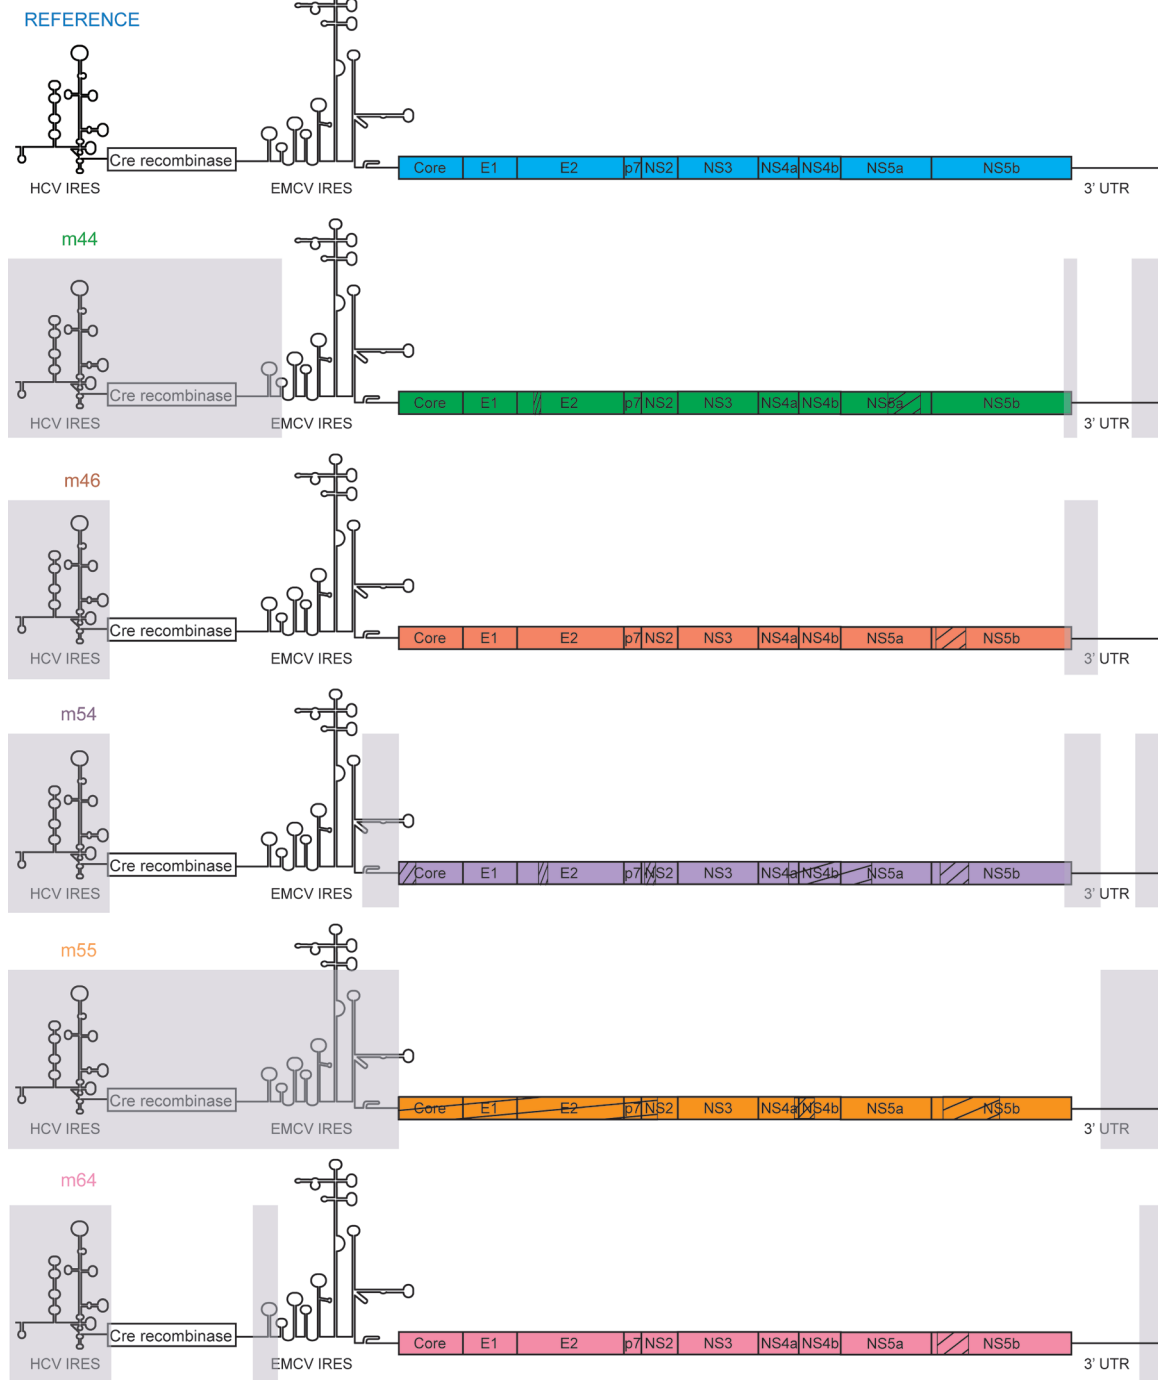

**b**

| Genomic Region | 44             | 46            | 54           | 55           | 64            |
|----------------|----------------|---------------|--------------|--------------|---------------|
| 5'UTR          |                |               |              |              |               |
| nlsCRE         |                |               | G715A (1/5)  |              |               |
|                |                |               | T862C (1/5)  |              |               |
| EMCV IRES      |                |               | C1775T (1/4) |              | T1885C (1/5)  |
|                |                |               | T1875C (2/4) |              |               |
| core           | C2289T (1/7)   |               |              |              |               |
| E1             | C2656T (3/14)  |               | C2909T (1/5) |              |               |
|                | C3037T(2/12)   |               | C2993T (5/5) |              |               |
|                | T3073C (2/12)  |               |              |              |               |
|                | T3169A (1/12)  |               |              |              |               |
| E2             | A4221G (7/15)  |               | T3694C (1/5) |              | G3911A (1/12) |
| p7             |                |               |              |              |               |
| NS2            | G4616A(1/15)   | G4616A (1/10) | C4657T (1/8) |              | G4612A (1/12) |
|                | C4785T (1/15)  | C4905T (1/6)  |              |              | G4685A (1/12) |
|                |                | G5064A (1/5)  |              |              |               |
| NS3            | C5312T (1/23)  | C5595T (1/8)  | C5208T (1/2) |              | C5175T (1/6)  |
|                |                | G6118A (1/11) |              |              | C5457T (1/10) |
|                |                | A6225G (1/11) |              |              | A5571G (1/11) |
|                |                | T6672C (1/6)  |              |              | C5668T (1/12) |
|                |                | T6853C (1/6)  |              |              | C6939T (2/10) |
|                |                | G6995T (1/6)  |              |              | G6995T (2/10) |
|                |                |               |              |              | T7013C (1/10) |
| NS4A           |                |               |              |              |               |
| NS4B           | G7916A(2/11)   |               |              | C7895T (1/8) |               |
| NS5A           | A8049G(1/12)   | C8379T (1/15) | C8957G (5/5) | T8144C (1/8) | T8178C (1/11) |
|                | G8304A (1/13)  | T8602C (1/15) | T8958A (5/5) | A8323G (1/8) | G8304A (1/11) |
|                |                | G8906A (1/7)  |              |              | G8615A (1/15) |
|                |                | C8957G (3/7)  |              |              | T8878C (1/5)  |
|                |                | T8958A(3/7)   |              |              |               |
|                |                | C9109T (1/7)  |              |              |               |
| NS5B           | C10244T (1/12) | C10214T (1/3) |              |              |               |
|                | C10922G (1/3)  |               |              |              |               |
| 3'UTR          |                |               |              |              |               |
|                |                |               |              |              |               |

c

**Bi-nlsCre-Jc1Flag2****m44 m46 m54 m55 m64 more than one mouse sample with mutation**

ACCTGCCCTAATAGGGGCGACACTCCGCCATGAATCACTCCCCTGTGAGGAACTACTG  
 TCTTACGCAGAAAGCGCCTAGCCATGGCGTTAGTATGAGTGTGTCGTACAGCCTCCAGGC  
 CCCCCCTCCCGGGAGAGCCATAGTGGTCTGCGGAACCGGTGAGTACACCGGAATTGCC  
 GGAAGACTGGGTCTTTCTTGGATAAACCCACTCTATGCCCGGCCATTTGGGCGTGCC  
 CCCGCAAGACTGCTAGCCGAGTAGCGTTGGGTTGCGAAAGGCCTTGTGGTACTGCCTGA  
 TAGGGCGCTTGCAGAGTGCCCCGGGAGGTCTCGTAGACCGTGCACCATGAGCACAAATCC  
 TAAACCTCAAAGAAAAACCAAAGAAACACCAACCGTGCCCAACGCGTATGCCCAAGA  
 AGAAGAGGAAGGTGTCCAATTTACTGACCGTACACCAAAATTTGCCTGCATTACCGGTC  
 GATGCAACGAGTGATGAGGTTTCGCAAGAACCTGATGGACATGTTTCAGGGATCGCCAGGC  
 GTTTTCTGAGCATACTGGAAAATGCTTCTGTCCGTTTGC CGGTCGTGGGCGGCATGGT  
 GCAAGTTGAATAACCGGAAATGGTTTCCCGCAGAACCTGAAGATGTTTCGCGATTATCTT  
 CTATATCTTCAGGCGCGCGGTCTGGCAGTAAAACTATCCAGCAACATTTGGGCCAGCT  
 AAACATGCTTCATCGTCGGTCCGGGCTGCCACGACCAAGTGACAGCAATGCTGTTTCAC  
 TGGTTATGCGGCGGATCCGAAAAGAAAACGTTGATGCCGGTGAACGTGCAAAACAGGCT  
 CTAGCGTTCGAACGCACTGATTTTCGACCAGGTTTCGTTCACTCATGGAAAATAGCGATCG  
 CTGCCAGGATATACGTAATCTGGCATTCTGGGGATTGCTTATAACACCCTGTTACGTA  
 TAGCCGAAATTGCCAGGATCAGGGTTAAAGATATCTCACGTA CTGACGGTGGGAGAATG  
 TTAATCCATATTGGCAGAACGAAAACGCTGGTTAGCACCGCAGGTGTAGAGAAGGCACT  
 TAGCCTGGGGTAACTAACTGGTTCGAGCGATGGATTTCCGTCTCTGGTGTAGCTGATG  
 ATCCGAATAACTACCTGTTTTGCGGGTTCAGAAAAAATGGTGTGCGCGCCATCTGCC  
 ACCAGCCAGCTATCAACTCGCGCCCTGGAAGGGATTTTTGAAGCAACTCATCGATTGAT  
 TTACGGCGCTAAGGATGACTCTGGTTCAGAGATACCTGGCCTGGTCTGGACACAGTGCC  
 GTGTGCGAGCCGCGGAGATATGGCCCGCTGGAGTTTCAATACCGGAGATCATGCAA  
 GCTGGTGGCTGGACCAATGTAAATATTGTCATGAACTATATCCGTAACCTGGATAGTGA  
 AACAGGGGCAATGGTGCGCCCTGCTGGAAGATGGCGATCTGTACAAGTAAGTTTAAACCC  
 TCTCCCTCCCCCCCCCTAACGTTACTGGCCGAAGCCGCTTGGAAATAAGGCCGGTGTGC  
 GTTTGTCTATATGTTATTTTCCACCATATTGCCGTCTTTTGGCAATGTGAGGGCCCGGA  
 AACCTGGCCCTGTCTTCTTGACGAGCATTCTAGGGGTCTTTCCCCTCTCGCCAAAGGA  
 ATGCAAGGTCTGTTGAATGTCGTGAAGGAAGCAGTTCCTCTGGAAGCTTCTTGAAGACA  
 ACAACGTCTGTAGCGACCCTTTGCAGGCAGCGGAACCCCCACCTGGCGACAGGTGCC  
 TCTGCGGCCAAAAGCCACGTGTATAAGATACACCTGCAAAGGCGGCACAACCCAGTGC  
 CACGTTGTGAGTTGGATAGTTGTGGAAAGAGTCAAATGGCTCTCTCTCAAGCGTATCTCAA  
 CAAGGGGCTGAAGGATGCCCAGAAGGTACCCCATTTGTATGGGATCTGATCTGGGGCCTC  
 GGTGCACATGCTTTACATGTGTTTAGTCGAGGTTAAAAACGTCTAGGCCCCCCGAACC  
 ACGGGGACGTGGTTTTCTTTGAAAAACACGATAATACCATGAGCACAAATCCTAAACC  
 TCAAAGAAAACCAAAGAAACACCAACCGTGCACCACAAGACGTTAAGTTTCCGGGCG  
 GCGCCAGATCGTTGGCGGAGTATACTTGTGCGCGCAGGGGCCCCAGGTTGGGTGTG  
 CGCGGACAAGGAAGACTTCGGAGCGGTCCAGCCACGTGGAAGGCGCCAGCCATCCC  
 TAAAGATCGGCGCTCCACTGGCAAATCCTGGGGAAAACCAGGATACCCCTGGCCCCTAT  
 ACGGGAATGAGGGACTCGGCTGGGCAGGATGGCTCCTGTCCCCCGAGGTTCCCGTCCC

TCTTGGGGCCCCAATGACCCCCGGCATAGGTGCGGCAACGTGGGTAAGGTCATCGATAC  
 CCTAACGTGCGGCTTTGCCGACCTCATGGGGTACATCCCTGTCTGTGGGCGCCCCGCTCG  
 GCGGCGTCGCCAGAGCTCTCGCGCATGGCGTGAGAGTCTTGAGGACGGGGTTAATTTT  
 GCAACAGGGAACCTACCCGGTTGCTCCTTTTCTATCTTCTTGCTGGCCCTGCTGTCCTG  
 CATCACCACCCCGGTCTCCGCTGCCGAAGTGAAGAACATCAGTACCGGCTACATGGTGA  
CTAACGACTGCACCAATGACAGCATTACCTGGCAGCTCCAGGCTGCTGTCCTCCACGTC  
 CCCGGGTGCGTCCCCTGCGAGAAAGTGGGGAATGCATCTCAGTGCTGGATACCGGTCTC  
 ACCGAATGTGGCCGTGCAGCGGCCCGGCCCTCACGCAGGGCTTGGGACGCACATCG  
 ACATGGTTGTGATGTCCGCCACGCTCTGCTCTGCCCTCTACGTGGGGGACCTCTGCGGT  
 GGGGTGATGCTCGCAGCCCAAATGTTTATTGTCTCGCCGACGACCACTGGTTTGTCCA  
 AGACTGCAATTGCTCCATCTACCCTGGTACCATCACTGGACACCGCATGGCATGGGACA  
 TGATGATGAAGTGGTGCACCACGGCTACCATGATCTTGGCGTACGCGATGCGTGTCCCC  
 GAGGTCATTATAGACATCATTAGCGGGGCTCATTGGGGCGTCATGTTGGGCTTGGCCTA  
 CTTCTCTATGCAGGGAGCGTGGGCGAAAGTCGTTGTCATCCTTCTGTTGGCCGCCGGG  
 TGGACGCGGACTACAAGGACGACGACGACAAGGGCAGCGCGCGCACCCATACTGTT  
 GGGGGTTCTGCCGCGCAGACCACCGGGCGCCTACCAGCTTATTTGACATGGGCCCCAG  
 GCAGAAAATCCAGCTCGTTAACACCAATGGCAGCTGGCACATCAACCGCACCGCCCTGA  
 ACTGCAATGACTCCTTGCACACCGGCTTTATCGCGTCTCTGTTCTACACCCACAGCTTC  
 AACTCGTCAGGATGTCCCGAACGCATGTCCGCCTGCCGAGTATCGAGGCCTTCCGGGT  
 GGGATGGGGCGCCTTGCAATATGAGGATAATGTCACCAATCCAGAGGATATGAGACCCT  
 ATTGCTGGCACTACCCACCAAGGCAGTGTGGCGTGGTCTCCGCGAAGACTGTGTGTGGC  
 CCAGTGTACTGTTTTACCCCCAGCCCAGTGGTAGTGGGCACGACCGACAGGCTTGGAGC  
 GCCACTTACACGTGGGGGGAGAATGAGACAGATGTCTTCTTATTGAACAGCACTCGAC  
 CACCGCTGGGGTCATGGTTCGGCTGCACGTGGATGAACTCTTCTGGCTACACCAAGACT  
 TGCGGCGCACCCCTGCCGTA TAGAGCTGACTTCAACGCCAGCACGGACCTGTTGTG  
 CCCACGGACTGTTTTAGGAAGCATCCTGATACCACTTACCTCAAATGCGGCTCTGGGC  
 CCTGGCTCACGCCAAGGTGCCTGATCGACTACCCCTACAGGCTCTGGCATTACCCCTGC  
 ACAGTTAACTATAACCATCTTCAAATAAGGATGTATGTGGGAGGGGTTGAGCACAGGCT  
 CACGGCTGCATGCAATTTCACTCGTGGGGATCGTTGCAACTTGGAGGACAGAGACAGAA  
 GTCAACTGTCTCCTTTGTTGCACTCCACCACGGAATGGGCCATTTTACCTTGCTCTTAC  
 TCGGACCTGCCCGCCTTGTGACTGGTCTTCTCCACCTCCACCAAACATCGTGGACGT  
 ACAATTCATGTATGGCCTATCACCTGCCCTCACAAATAACATCGTCCGATGGGAGTGGG  
 TAATACTCTTATTCTGCTCTTAGCGGACGCCAGGTTTGGCCTGCTTATGGATGCTC  
 ATCTTGTGGGCCAGGCCGAAGCAGCACTAGAGAAGCTGGTCATCTTGCACGCTGCGAG  
 CGCAGCTAGCTGCAATGGCTTCTATATTTTGTGATCTTTTTCGTGGCTGCTTGGTACA  
 TCAAGGGTCCGGTAGTCCCCTTAGCTACCTATTCCCTCACTGGCCTGTGGTCTTTAGC  
 CTA CTGCTCCTAGCATTGCCCCAACAGGCTTATGCTTATGACGCATCTGTGCATGGCCA  
 GATAGGAGCGGCTCTGCTGGTAATGATCACTCTCTTACTCTCACCCCCGGGTATAAGA  
 CCCTCCTCGGCCAGGTGTCTGTGGTGGTTGTGCTATCTCCTGACCCTGGGGGAAGCCATG  
 ATTCAGGAGTGGGTACCACCCATGCAGGTGCGCGGCCGGCCGCGATGGCATCGCGTGGC  
 CGTCACTATATTCTGCCCGGGTGTGGTGTGTTGACATTACCAAATGGCTTTTGGCGTTGC  
 TTGGGCCTGCTTACCTCTTAAGGGCCGCTTTGACACATGTGCCGTA CTTCGTGAGAGCT  
 CACGCTCTGATAAGGGTATGCGCTTTGGTGAAGCAGCTCGCGGGGGGTAGGTATGTTCA  
 GGTGGCGCTATTGGCCCTTGGCAGGTGGACTGGCACCTACATCTATGACCACCTCACAC

CTATGTCGGACTGGGCCGCTAGCGGCCTGCGCGACTTAGCGGTCGCCGTGGAACCCATC  
ATCTTCAGTCCGATGGAGAAGAAGGTCATCGTCTGGGGAGCGGAGACGGCTGCATGTGG  
GGACATTCTACATGGACTTCCCGTGTCCGCCCCGACTCGGCCAGGAGATCCTCCTCGGCC  
CAGCTGATGGCTACACCTCCAAGGGGTGGAAGCTCCTTGCTCCCATCACTGCTTATGCC  
CAGCAAACACGAGGCCTCCTGGGCGCCATAGTGGTGAGTATGACGGGGCGTGACAGGAC  
AGAACAGGCCGGGGAAGTCCAAATCCTGTCCACAGTCTCTCAGTCCTTCCTCGGAACAA  
CCATCTCGGGGGTTTTGTGGACTGTTTACCACGGAGCTGGCAACAAGACTCTAGCCGGC  
TTACGGGGTCCGGTCACGCAGATGTACTCGAGTGCTGAGGGGGACTTGGTAGGCTGGCC  
CAGCCCCCTGGGACCAAGTCTTTGGAGCCGTGCAAGTGTGGAGCCGTCGACCTATATC  
TGGTCACGCGGAACGCTGATGTCATCCCGGCTCGGAGACGCGGGGACAAGCGGGGAGCA  
TTGCTCTCCCCGAGACCCATTTCACTTGAAGGGGTCTCGGGGGGCCGGTGCTCTG  
CCCTAGGGGCCACGTCGTTGGGCTCTTCCGAGCAGCTGTGTGCTCTCGGGGCGTGGCCA  
AATCCATCGATTTTCATCCCGTTGAGACACTCGACGTTGTTACAAGGTCTCCCACCTTC  
AGTGACAACAGCACGCCACCGGCTGTGCCCCAGACCTATCAGGTCGGGTACTTGCATGC  
TCCAACCTGGCAGTGGAAAGAGCACCAAGGTCCCTGTGCGGTATGCCGCCAGGGGTACA  
AAGTACTAGTGCTTAACCCCTCGGTAGCTGCCACCCTGGGGTTTGGGGCGTACCTATCC  
AAGGCACATGGCATCAATCCCAACATTAGGACTGGAGTCAGGACCGTGATGACCGGGGA  
GGCCATCACGTA CTCCACATATGGCAAATTTCTCGCCGATGGGGGCTGCGCTAGCGGC  
CCTATGACATCATATGCGATGAATGCCACGCTGTGGATGCTACCTCCATTCTCGGC  
ATCGGAACGGTCCTTGATCAAGCAGAGACAGCCGGGGTCAGACTAACTGTGCTGGCTAC  
GGCCACACCCCCGGGTCAGTGACAACCCCCCATCCCGATATAGAAGAGGTAGGCCCTCG  
GGCGGGAGGGTGAGATCCCCTTCTATGGGAGGGCGATTCCCCTATCCTGCATCAAGGGA  
GGGAGACACCTGATTTTCTGCCACTCAAAGAAAAAGTGTGACGAGCTCGCGGCGGCCCT  
TCGGGGCATGGGCTTGAATGCCGTGGCATACTATAGAGGGTTGGACGTCTCCATAATAC  
CAGCTCAGGGAGATGTGGTGGTCGTCGCCACCGACGCCCTCATGACGGGGTACACTGGA  
GACTTTGACTCCGTGATCGACTGCAATGTAGCGGTACCCAAGCTGTGCACTTCAGCCT  
GGACCCACCTTCACTATAACCACACAGACTGTCCACAAGACGCTGTCTCACGCAGTC  
AGCGCCGCGGGCGCACAGGTAGAGGAAGACAGGGCACTTATAGGTATGTTTCCACTGGT  
GAACGAGCCTCAGGAATGTTTGACAGTGTAGTGCTTTGTGAGTGCTACGACGCAGGGGC  
TGCGTGGTACGATCTCACACCAGCGGAGACCACCGTCAGGCTTAGAGCGTATTTCAACA  
CGCCCCGGCCTACCCGTGTGTC AAGACCATCTTGAATTTTGGGAGGCAGTTTTACCGGC  
CTCACACACATAGACGCCCACTTCTCTCCCAAACAAGCAAGCGGGGGAGA ACTTCGC  
GTACCTAGTAGCCTACCAAGCTACGGTGTGCGCCAGAGCCAAGGCCCTCCCCGTCCT  
GGGACGCCATGTGGAAGTGCCTGGCCCCGACTCAAGCCTACGCTTGCGGGGCCACACCT  
CTCCTGTACCGTTTTGGGCCCTATTACCAATGAGGTACCCTCACACACCCTGGGACGAA  
GTACATCGCCACATGCATGCAAGCTGACCTTGAGGTCATGACCAGCACGTGGGTCCCTAG  
CTGGAGGAGTCTTGGCAGCCGTGCGCCCATATTGCCTGGCGACTGGATGCGTTTTCCATC  
ATCGGCCGCTTGCACGTCAACCAGCGAGTCGTCGTTGCGCCGGATAAGGAGGTCCTGTA  
TGAGGCTTTTGTATGAGATGGAGGAATGCGCCTCTAGGGCGGCTCTCATCGAAGAGGGGC  
AGCGGATAGCCGAGATGTTGAAGTCCAAGATCCAAGGCTTGCTGCAGCAGGCCTCTAAG  
CAGGCCCAGGACATAACAACCCGCTATGCAGGCTTCATGGCCCAAAGTGGAACAATTTTG  
GGCCAGACACATGTGGA ACTTCATTAGCGGCATCCAATACCTCGCAGGATTGTCAACAC  
TGCCAGGGAACCCCGGGTGGCTTCCATGATGGCATT CAGTGCCGCCCTCACCAGTCCG  
TTGTGACACAGTACCACCATCCTTCTCAACATCATGGGAGGCTGGTTAGCGTCCCAGAT



CGCACCACCCGCGGGGGCCACCGGCTTTGTCGTCAGTGGCCTGGTGGGGGCTGCCGTGG  
 GCAGCATAGGCCTGGGTAAGGTGCTGGTGGACATCCTGGCAGGATATGGTGCGGGCATT  
 TCGGGGGCCCTCGTCGCATTCAAGATCATGTCTGGCGAGAAGCCCTCTATGGAAGATGT  
 CATCAATCTACTGCCTGGGATCCTGTCTCCGGGAGCCCTGGTGGTGGGGGTCATCTGCG  
 CGGCCATCTGCGCCGCCACGTGGGACCGGGGGAGGGCGCGGTCCAATGGATGAACAGG  
 CTTATTGCCTTTGCTTCCAGAGGAAACCACGTGCGCCCTACTACTACGTGACGGAGTC  
 GGATGCGTCGCAGCGTGTGACCCAACTACTTGGCTCTCTTACTATAACCAGCCTACTCA  
 GAAGACTCCACAATTGGATAACTGAGGACTGCCCCATCCCATGCTCCGGATCCTGGCTC  
 CGCGACGTGTGGGACTGGGTTTGCACCATCTTGACAGACTTCAAAAATTGGCTGACCTC  
 TAAATTGTTCCCAAGCTGCCCGGCCCTCCCTTTCATCTCTTGTCAAAGGGGTACAAGG  
 GTGTGTGGGCCGGCACTGGCATCATGACCACGCGCTGCCCTTGCGGCGCCAACATCTCT  
 GGCAATGTCCGCCTGGGCTCTATGAGGATCACAGGGCCTAAAACCTGCATGAACACCTG  
 GCAGGGGACCTTTCCTATCAATTGCTACACGGAGGGCCAGTGCGCGCCGAAACCCCCCA  
 CGAACTACAAGACCGCCATCTGGAGGGTGGCGGCCTCGGAGTACGCGGAGGTGACGCAG  
CATGGGTGCTACTCCTATGTAACAGGACTGACCACTGACAATCTGAAAATTCCCTTGCCA  
 ACTACCTTCTCCAGAGTTTTTCTCCTGGGTGGACGGTGTGCAGATCCATAGGTTTGCAC  
 CCACACCAAGCCGTTTTTCCGGGATGAGGTCTCGTTCTGCGTTGGGCTTAATTCCTAT  
 GCTGTCCGGTCCAGCTTCCCTGTGAACCTGAGCCCGACGCAGACGTATTGAGGTCCAT  
GCTAACAGATCCGCCCCACATCACGGCGGAGACTGCGGGCGGGCGCTTGGCACGGGGAT  
 CACCTCCATCTGAGGCGAGCTCCTCAGTGAGCCAGCTATCAGCACCGTCGCTGCGGGCC  
 ACCTGCACCACCCACAGCAACACCTATGACGTGGACATGGTCGATGCCAACCTGCTCAT  
 GGAGGGCGGTGTGGCTCAGACAGAGCCTGAGTCCAGGGTGCCCGTTCTGGACTTTCTCG  
 AGCCAATGGCCGAGGAAGAGAGCGACCTTGAGCCCTCAATACCATCGGAGTGCATGCTC  
 CCCAGGAGCGGGTTTTCCACGGGCCTTACCGGCTTGGGCACGGCCTGACTACAACCCGCC  
 GCTCGTGGAATCGTGGAGGAGGCCAGATTACCAACCGCCACCGTTGCTGGTTGTGCTC  
 TCCCCCCCCCAAGAAGGCCCCGACGCCTCCCCAAGGAGACGCCGGACAGTGGGTCTG  
 AGCGAGAGCACCATATCAGAAGCCCTCCAGCAACTGGCCATCAAGACCTTTGGCCAGCC  
 CCCCTCGAGCGGTGATGCAGGCTCGTCCACGGGGGCGGGCGCCGCGAATCCGGCGGTG  
 CGACGTCCCCTGGTGGAGCCGGCCCCCTCAGAGACAGGTTCCGCCTCCTCTATGCCCCC  
 CTCGAGGGGGAGCCTGGAGATCCGGACCTGGAGTCTGATCAGGTAGAGCTTCAACCTCC  
 CCCCCAGGGGGGGGGGTAGCTCCCGGTTCCGGCTCGGGGTCTTGGTCTACTTGCTCCG  
 AGGAGGACGATAACCACCGTGTGCTGCTCCATGTACTACTCCTGGACCGGGGCTCTAATA  
 ACTCCCTGTAGCCCCGAAGAGGAAAAGTTGCCAATCAACCCTTTGAGTAACTCGCTGTT  
 GCGATAACCATAACAAGGTGTACTGTACAACATCAAAGAGCGCCTCACAGAGGGCTAAAA  
 AGGTAACTTTTGACAGGACGCAAGTGCTCGACGCCATTATGACTCAGTCTTAAAGGAC  
 ATCAAGCTAGCGGCTTCCAAGGTGAGCGCAAGGCTCCTCACCTTGGAGGAGGCGTGCCA  
 GTTACTCCACCCCATTTCTGCAAGATCCAAGTATGGATTGCGGGGCCAAGGAGGTCCGCA  
 GCTTGTCCGGGAGGGCCGTTAACCACATCAAGTCCGTGTGGAAGGACCTCCTGGAAGAC  
 CCACAAACACCAATTCCCACAACCATCATGGCCAAAAATGAGGTGTTCTGCGTGGACCC  
 CGCCAAGGGGGTAAGAAACCAGCTCGCCTCATCGTTTACCCTGACCTCGGCGTCCGGG  
 TCTGCGAGAAAATGGCCCTCTATGACATTACACAAAAGCTTCCTCAGGCGGTAATGGGA  
 GCTTCCATGGCTTCCAGTACTCCCCTGCCCAACGGGTGGAGTATCTCTTGAAGCATG  
 GGCGGAAAAGAAGGACCCCATGGGTTTTTCGTATGATACCCGATGCTTCGACTCAACCG  
 TCACTGAGAGAGACATCAGGACCGAGGAGTCCATATAACCAGGCCTGCTCCCTGCCCGAG

GAGGCCCGCACTGCCATACACTCGCTGACTGAGAGACTTTACGTAGGAGGGCCCATGTT  
 CAACAGCAAGGGTCAAACCTGCGGTTACAGACGTTGCGCGCCAGCGGGGTGCTAACCA  
 CTAGCATGGGTAACACCATCACATGCTATGTGAAAGCCCTAGCGGCCTGCAAGGCTGCG  
 GGGATAGTTGCGCCCACAATGCTGGTATGCGGCGATGACCTAGTAGTCATCTCAGAAAG  
 CCAGGGGACTGAGGAGGACGAGCGGAACCTGAGAGCCTTACGGAGGCCATGACCAGGT  
 ACTCTGCCCCCTCCTGGTGATCCCCCAGACCGGAATATGACCTGGAGCTAATAACATCC  
 TGTTCCCTCAAATGTGTCTGTGGCGTTGGGCCCGCGGGGCCCGCAGATACTACCTGAC  
 CAGAGACCCAACCACTCCACTCGCCGGGCTGCCTGGGAAACAGTTAGACACTCCCCTA  
 TCAATTCATGGCTGGGAAACATCATCCAGTATGCTCCAACCATATGGGTTGCGATGGTC  
 CTAATGACACACTTCTTCTCCATTCTCATGGTCCAAGACACCCTGGACCAGAACCCTCAA  
 CTTTGAGATGTATGGATCAGTATACTCCGTGAATCCTTTGGACCTTCCAGCCATAATTG  
 AGAGGTTACACGGGCTTGACGCCTTTTCTATGCACACATACTCTCACCACGAACTGACG  
 CGGGTGGCTTCAGCCCTCAGAAAACCTGGGGCGCCACCCCTCAGGGTGTGGAAGAGTCG  
 GGCTCGCGCAGTCAGGGCGTCCCTCATCTCCCGTGGAGGGAAAGCGGCCGTTTGCGGCC  
 GATATCTCTTCAATTGGGCGGTGAAGACCAAGCTCAAACCTCACTCCATTGCCGGAGGCG  
 CGCCTACTGGACTTATCCAGTTGGTTCACCGTCGGCGCCGGCGGGGGCGACATTTTTTCA  
 CAGCGTGTGCGCGCCCCGACCCCGCTCATTACTCTTCGGCCTACTCCTACTTTTTCGTAG  
 GGGTAGGCCTCTTCCCTACTCCCCGCTCGGTAGAGCGGCACACACTAGGTACACTCCATA  
 GCTAACTGTTCCTTTTTTTTTTTTTTTTTTTTTTTTTTTTTTTTTTTTTTTTTTTTTTTCTTT  
 TTTTTTTTTTTCCCTCTTTCTTCCCTTCTCATCTTATTCTACTTTCTTTCTTGGTGGCT  
 CCATCTTAGCCCTAGTCACGGCTAGCTGTGAAAGGTCCGTGAGCCGCATGACTGCAGAG  
 AGTGCCGTAACCTGGTCTCTCTGCAGATCATGT

**Supplementary figure 12. Analysis of HCV genomes isolated from HCV entry factor transgenic mice deficient in STAT1. (a-c)** Sequence analysis of HCV genomes isolated 4 weeks post infection from the serum of five individual STAT1-deficient mice transgenically expressing the HCV entry factors. **(a)** Schematic representation of the BiCre-Jc1 genomes used for inoculation of five individual mice including regions not covered in sequencing reactions (grey boxes). Genomes from the different animals are coded in different colors. The reference sequences derived from sequencing the inoculum matches the sequences of infectious cDNA clone of BiCreJc1 used to generate the virus stock. Hatched areas in the genome indicate regions within the different genomes in which mutations were identified. **(b)** Common mutations identified in more than one clonal sequence. **(c)** Sequence of BiCre-Jc1 with marked mutations identified in vivo. The color code of the mutation in the sequence matches the genome color scheme in supplementary figure 10a.
